# Supplementary material for: The Effect of Varying Interval Definitions on the Prevalence of SARS-CoV-2 Reinfections: A Retrospective Cross-Sectional Cohort Study
Source: MDPI journal article supplement (doi:10.3390/diagnostics12030719), 2022-03-15
Supplement: s1 [file s1]

## SUPPLEMENTARY MATERIAL

**Supplementary Table S1.** Number of reinfections according to different definitions, and corresponding Cp-values of first and second positive test.

| <b>Weeks between first and second positive test</b>                        | <b>Number of reinfections</b> | <b>Median Cp-value [IQR] first positive test</b> | <b>Median Cp-value [IQR] second positive test</b> |
|----------------------------------------------------------------------------|-------------------------------|--------------------------------------------------|---------------------------------------------------|
| 1                                                                          | 684                           | 25.1 [7.4]                                       | 33 [5.4]                                          |
| 2                                                                          | 260                           | 25.9 [7.5]                                       | 34.1 [6.1]                                        |
| 3                                                                          | 132                           | 26 [7.7]                                         | 33.2 [7.6]                                        |
| 4                                                                          | 89                            | 26.5 [8.5]                                       | 32.5 [8.1]                                        |
| 5                                                                          | 73                            | 26.5 [7.9]                                       | 31.1 [9.4]                                        |
| 6                                                                          | 68                            | 26.4 [7.7]                                       | 29.8 [8.8]                                        |
| 7                                                                          | 59                            | 26.3 [7.7]                                       | 29.2 [8.3]                                        |
| 8                                                                          | 52                            | 26.3 [8.8]                                       | 28.7 [8.1]                                        |
| 9                                                                          | 48                            | 26 [8.6]                                         | 28.7 [7.3]                                        |
| 10                                                                         | 46                            | 26 [8.1]                                         | 28.7 [7.7]                                        |
| 11                                                                         | 45                            | 26.1 [7.7]                                       | 28.7 [7.8]                                        |
| 12                                                                         | 44                            | 26.3 [8.0]                                       | 28.7 [7.1]                                        |
| 13                                                                         | 41                            | 26.1 [6.8]                                       | 28.7 [6.7]                                        |
| 14                                                                         | 39                            | 26.5 [7.8]                                       | 28.7 [6.5]                                        |
| 15                                                                         | 37                            | 26.5 [8.8]                                       | 28.7 [6.5]                                        |
| 16                                                                         | 37                            | 26.5 [8.8]                                       | 28.7 [6.5]                                        |
| 17                                                                         | 37                            | 26.5 [8.8]                                       | 28.7 [6.5]                                        |
| 18                                                                         | 35                            | 26.8 [8.3]                                       | 28.1 [6.0]                                        |
| 19                                                                         | 34                            | 26.6 [8.2]                                       | 28 [6.1]                                          |
| 20                                                                         | 34                            | 26.6 [8.2]                                       | 28 [6.1]                                          |
| Data are presented as number (%), or median[IQR]. IQR=interquartile range. |                               |                                                  |                                                   |
